# Supplementary material for: Exploring the insertion mechanism of pseudocapacitive perovskite oxide La–Ni–Co–O anode materials and the application to Li-ion capacitor and Li-based dual ion batteries
Source: Royal Society of Chemistry journal article supplement (doi:10.1039/d5nr03043a), 2025-01-01
Supplement: d5nr03043a1.pdf [file d5nr03043a1.pdf]

## Supporting Information

### Exploring the insertion mechanism of pseudocapacitive perovskite oxide La-Ni-Co-O anode materials and the application to Li-ion capacitor and Li-based dual ion batteries

*Yi Li<sup>1</sup>, Yuxi Huang<sup>1</sup>, Rui Ding\*, Caini Tan, Jian Guo, Yiqing Lu, Zhiqiang Chen, Yibo Zhang and Runzhi Xu*

Key Laboratory of Environmentally Friendly Chemistry and Applications of Ministry of Education,  
College of Chemistry, Xiangtan University, Xiangtan, Hunan 411105, P.R. China.

<sup>1</sup>The authors contribute equally to the work.

Corresponding author

\*E-mails: [drm8122@xtu.edu.cn](mailto:drm8122@xtu.edu.cn); [drm8122@163.com](mailto:drm8122@163.com)

## Table of Contents

### Experimental procedures

**Section 1.** Synthesis of LNCO materials

**Section 2.** Characterizations

**Section 3.** Electrochemical measurements

**Section 4.** calculations for  $C_m$ ,  $E_m$ ,  $P_m$

### Supplemental Figures

**Fig S1.** A picture of LNCO/LO(Ni:Co=1:0~0:1) samples.

**Fig S2.** The crystal structures of perovskite  $\text{LaMO}_3$  and detailed crystalline parameters for  $\text{LaNiO}_3$  and  $\text{LaCoO}_3$ .

**Fig S3.** TEM and HRTEM of LNCO(1:3)/LO.

**Fig S4.** (a)EDS (Inset shows scanning spectrum) of LNCO(1:3). (b) XRD peak area fitting.

**Fig S5.** Nitrogen sorption isothermals (a), pore volume (b) and pore size distribution (c) of LNCO (1:3)/LO Sample.

**Fig S6.** Ex-situ XPS spectra of LNCO(1:3)/LO pristine and discharged-0.01 V/charged-3.0 V states during the first discharging/charging cycle at  $0.1 \text{ A g}^{-1}$ : survey (a), C1s-fitted (a), Li1s- fitted (b) and F1s-fitted (c).

**Fig S7.** The pseudocapacitive and diffusion-controlled contributions to charge storage in the LNCO(1:3)/LO electrode (the shaded region is the identified pseudocapacitive contribution).

**Fig S8.** Performance of LNCO(1:0)/LO electrode with A electrolytes: CV plots for the first three cycles at  $0.3 \text{ mV s}^{-1}$  (a), GCD curves at  $0.1 \text{ A g}^{-1}$  for the first five cycles (b), GCD curves at  $0.1\text{-}3.2 \text{ A g}^{-1}$  (c), specific capacity and coulombic efficiency at  $0.1\text{-}3.2 \text{ A g}^{-1}$  (d), and cycling behavior at  $2 \text{ A g}^{-1}$  (e).

**Fig S9.** Performance of LNCO(3:1)/LO electrode with A electrolytes: CV plots for the first three cycles at  $0.3 \text{ mV s}^{-1}$  (a), GCD curves at  $0.1 \text{ A g}^{-1}$  for the first five cycles (b), GCD curves at  $0.1\text{-}3.2 \text{ A g}^{-1}$  (c), specific capacity and coulombic efficiency at  $0.1\text{-}3.2 \text{ A g}^{-1}$  (d), and cycling behavior at  $2 \text{ A g}^{-1}$  (e).

**Fig S10.** Performance of LNCO(1:1)/LO electrode with A electrolytes: CV plots for the first three cycles at  $0.3 \text{ mV s}^{-1}$  (a), GCD curves at  $0.1 \text{ A g}^{-1}$  for the first five cycles (b), GCD curves at  $0.1\text{-}3.2 \text{ A g}^{-1}$  (c), specific capacity and coulombic efficiency at  $0.1\text{-}3.2 \text{ A g}^{-1}$  (d), and cycling behavior at  $2 \text{ A g}^{-1}$  (e).

**Fig S11.** Performance of LNCO(1:3)/LO electrode with A electrolytes: CV plots for the first three cycles at  $0.3 \text{ mV s}^{-1}$  (a), GCD curves at  $0.1 \text{ A g}^{-1}$  for the first five cycles (b), GCD curves at  $0.1\text{-}3.2 \text{ A g}^{-1}$  (c), specific capacity and coulombic efficiency at  $0.1\text{-}3.2 \text{ A g}^{-1}$  (d), and cycling behavior at  $2 \text{ A g}^{-1}$  (e).

**Fig S12.** Performance of LNCO(0:1)/LO electrode with A electrolytes: CV plots for the first three cycles at  $0.3 \text{ mV s}^{-1}$  (a), GCD curves at  $0.1 \text{ A g}^{-1}$  for the first five cycles (b), GCD curves at  $0.1\text{-}3.2 \text{ A g}^{-1}$  (c), specific capacity and coulombic efficiency at  $0.1\text{-}3.2 \text{ A g}^{-1}$  (d), and cycling behavior at  $2 \text{ A g}^{-1}$  (e).

**Fig S13.** Performance of LNCO(1:3)/LO//AC LICs with A electrolytes: CV windows at  $10 \text{ mV s}^{-1}$  (a), CV plots at  $10\sim 160 \text{ mV s}^{-1}$  in  $4.0 \text{ V}$  (b),  $4.3 \text{ V}$  (c),  $4.5 \text{ V}$  (d).

**Fig S14.** Performance of LNCO(1:3)/LO//KS6 DIBs with A electrolytes: CV windows at  $10 \text{ mV s}^{-1}$  (a), CV plots at  $10\sim 160 \text{ mV s}^{-1}$  in  $5.0 \text{ V}$  (b),  $5.2 \text{ V}$  (c).

**Fig S15.** GCD curves of LNCO(1:3)/LO//KS6 DIBs and LNCO(1:3)/LO//AC LICs with A electrolytes: GCD curves at  $0.5\text{-}8.0 \text{ A g}^{-1}$  in  $5.0 \text{ V}$  (a),  $5.2 \text{ V}$  (b) of LNCO(1:3)/LO//KS6 Li-DIBs; GCD curves at  $0.5\text{-}16.0 \text{ A g}^{-1}$  in  $4.0 \text{ V}$  (c),  $4.3 \text{ V}$  (d),  $4.5 \text{ V}$  (e) of LNCO(1:3)/LO//AC LICs.

## Supplemental Tables

**Table S1.** Chemicals, agents and materials used in the study.

**Table S2.** Specific capacity and cycling retention of the LNCO/LO(Ni:Co=1:0~0:1) electrodes.

**Table S3.** Specific capacity cycling retention of AC and KS6 electrodes.

**Table S4.** Performance summary of the LICs and Li-DIBs in the study under room temperature ( $25^\circ\text{C}$ ),  $\text{m}^+/\text{m}^-=1:1$ .

**Table S5.** A comparison for the performance of the LNCO(1:3)/LO//AC LICs in the study with some reported LICs.

**Table S6.** A comparison for the performance of the LNCO(1:3)/LO//KS6 Li-DIBs in the study with some reported Li-DIBs.

#### **References.**



## Experimental Procedures

### Synthesis of LNCO materials

The chemicals in the experiment were of analytical level (A.R.) and directedly used without further treatment (**Table S1**). The LNCO samples were synthesized via precipitation route. Take the procedure of LNCO(1:3) for an example. Firstly, 1.0 mmol  $\text{La}(\text{NO}_3)_3 \cdot x\text{H}_2\text{O}$ , 0.25 mmol  $\text{Ni}(\text{NO}_3)_2 \cdot 6\text{H}_2\text{O}$  and 0.75 mmol  $\text{Co}(\text{NO}_3)_2 \cdot 6\text{H}_2\text{O}$  were dissolved in 50 mL deionized water, and the mixture was stirred magnetically until fully dispersed. Secondly, a mixture of 2 mol  $\text{L}^{-1}$  NaOH and 1 mol  $\text{L}^{-1}$   $\text{Na}_2\text{CO}_3$  was added to the solution and the pH was adjusted to 10. After standing age for 4 h, it was washed with deionized water for several times and collected by vacuum filtration. The precursor products were dried overnight at 100 °C and calcined in muff furnace at 700 °C for 6 h to obtain the products. The other four LNCO samples (1:0, 3:1, 1:1 and 0:1) were also synthesized as the procedure described above except by using different stoichiometric molar ratios of Ni:Co at the beginning. (The above-mentioned chemicals, agents and materials are listed in the **Table S1**.)

### Characterizations

The phases and crystallinity properties were determined by X-ray diffraction (XRD). The surface structures were checked by X-ray photoelectron spectra (XPS). The morphology and size of particles were analyzed by scanning electron microscopy (SEM) and transmission electron microscopy (TEM). The crystalline microstructures were resolved by the high-resolution TEM (HRTEM) and selected area electron diffraction (SAED). The element composition and distribution were measured by the X-ray energy dispersive spectra (EDS), inductively coupled plasma-optical emission spectrometer (ICP-OES) and mapping. The specific surface area, pore volume and size distribution were examined by nitrogen isothermal sorptions with Brunauer-Emmett-Teller (BET) and Barrett-Joyner-Halenda (BJH) methods.

### Electrochemical measurements

The electrodes were prepared by the following two steps: firstly, A well-dispersed mixture of 70 wt% active materials (as-synthesized LNCO(1:0~0:1) or commercial AC or KS6 , 20 wt% acetylene black (AB) conductive agent and 10 wt% polyvinylidene fluoride binder (PVDF, which was dissolved in into the N-methyl-2-pyrrolidone (NMP)) were casted onto the current collectors (Cu foil and carbon-coated Al foil were used for the collectors of anode and cathode respectively), and followed by drying in a vacuum oven at 110 °C for 12 h; secondly, the electrodes were pounched into disks with diameter of 12 mm, and the mass loading of active materials was about 1.2~4.5  $\text{mg cm}^{-2}$ . The electrochemical performances were examined via CHI 660E electrochemical working stations and Neware-CT-4008 testers. Tests for electrodes (LNCO/LO, AC, KS6,) were conducted in halfcells by using the type 2032 coin cells. Tests for LICs (LNCO(1:3)/LO//AC) and Li-DIBs (LNCO(1:3)/LO//KS6) were conducted via full-cells with type 2032 coin cells, with certain mass ratios of anode and cathode

active materials (**Tables S2-4**). The electrolytes used for LNCO/LO, AC, KS6 electrodes, LICs and Li-DIBs were 1 M LiPF<sub>6</sub> dissolved in the mixed solvents of ethylene carbonate (EC), ethylmethyl carbonate (EMC) and dimethyl carbonate (DMC) (1:1:1 in volume) with 1% vinylene carbonate (VC) additives (LBC-305-01, CAPCHEM, marked A electrolytes). All cell assemblies were performed in a high pure Ar-filled dry glovebox (MIKROUNA, O<sub>2</sub> and H<sub>2</sub>O < 0.1 ppm) and all tests were carried out at room temperature (about 25 °C). (The more detailed information of the above-mentioned chemicals, agents and materials can be seen the **Table S1**; the calculations for the  $m_+/m_-$ ,  $C_m$ ,  $E_m$  and  $P_m$  can be seen in the Methods.) Specifically, the galvanostatic charge-discharge tests (GCD) (rate, cycle) of LICs and Li-DIBs with anode presodiated at different current densities were on the Neware CT-4008 battery testing system. And the cyclic voltammetry (CV) and electrochemical impedance spectroscopy (EIS) tests were carried out by means of the CHI-660E and CHI-440C electrochemical working stations.

#### Calculations for $C_m$ , $E_m$ , $P_m$

The specific capacity ( $C_m$ , mAh g<sup>-1</sup>), energy density ( $E_m$ , Wh kg<sup>-1</sup>) for LICs, energy density ( $E_m$ , Wh kg<sup>-1</sup>) for Li-DIBs, and power density ( $P_m$ , kW kg<sup>-1</sup>) were calculated according to the Equations S(1)-S(5).

$$m_+/m_- = 1:1 \quad (1)$$

$$C_m = Q / m \quad (2)$$

$$E_m \text{ (Capacitor)} = 0.5 (C_m \Delta V) \quad (3)$$

$$E_m \text{ (Battery)} = (C_m V) \quad (4)$$

$$P_m = 3.6 E_m / t_d \quad (5)$$

Where  $m$ ,  $Q$ ,  $\Delta V$ ,  $V$  and  $t_d$  refer to the mass of active materials (mg) (for half cells, it means the mass of active materials of anode or cathode; for LICs and Li-DIBs full cells, it means the total masses of active materials of anode and cathode), specific charge or discharge capacity (mAh g<sup>-1</sup>, for anode, it means the charge capacity; for cathode and full-cells, it refers to the discharge capacity), potential of the discharging plateaus (V), and discharging time (s), respectively.

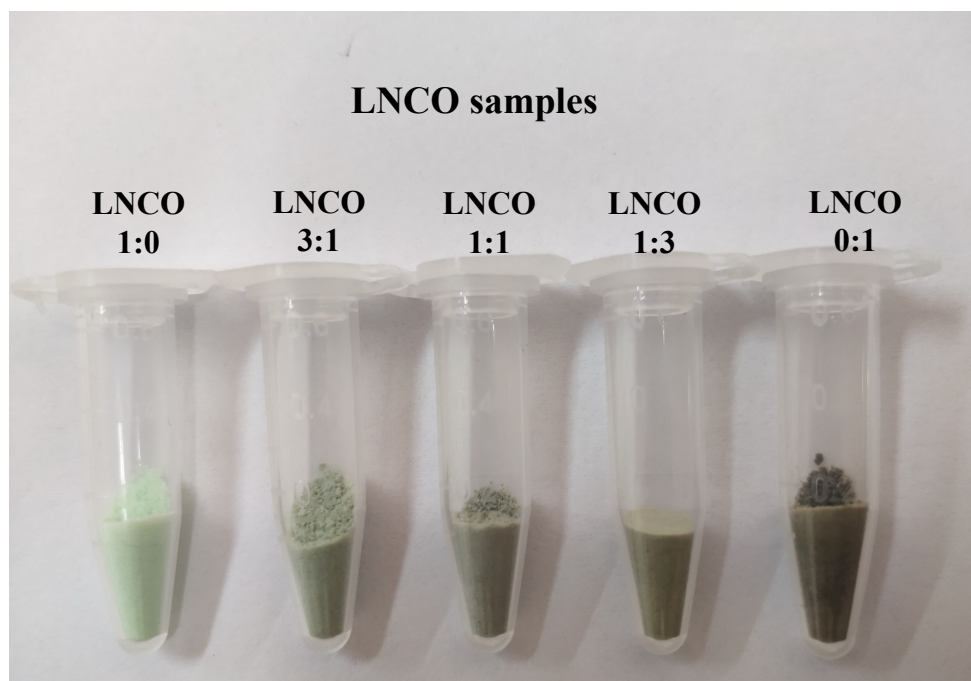

**Fig S1.** A picture of LNCO/LO(Ni:Co=1:0~0:1) precursor samples.

**a**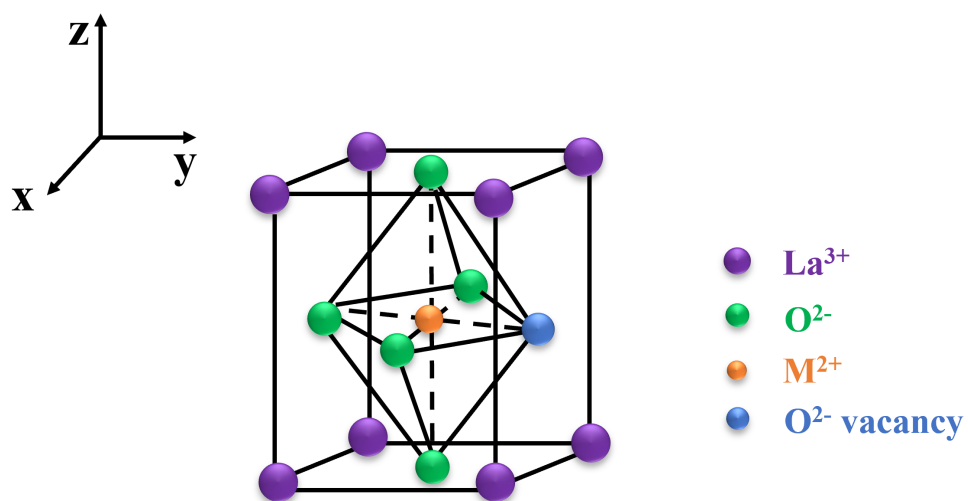**b**

| Sample                  | ICCD-PDF | Crystal system | Space group | Cell (a x b x c) / $\text{\AA}^3$ |
|-------------------------|----------|----------------|-------------|-----------------------------------|
| $\text{LaNiO}_3$        | 34-1181  | Hexagonal      | R-Center    | 5.451×5.451×6.564                 |
| $\text{LaCoO}_3$        | 48-0123  | Hexagonal      | R-3c (167)  | 5.4445×5.4445×13.0936             |
| $\text{La}_2\text{O}_3$ | 05-0602  | Hexagonal      | P-3m1(164)  | 3.9373×3.9373×6.1299              |

**Fig S2.** The crystal structures of perovskite  $\text{LaMO}_3$  and detailed crystalline parameters for  $\text{LaNiO}_3$  and  $\text{LaCoO}_3$ .

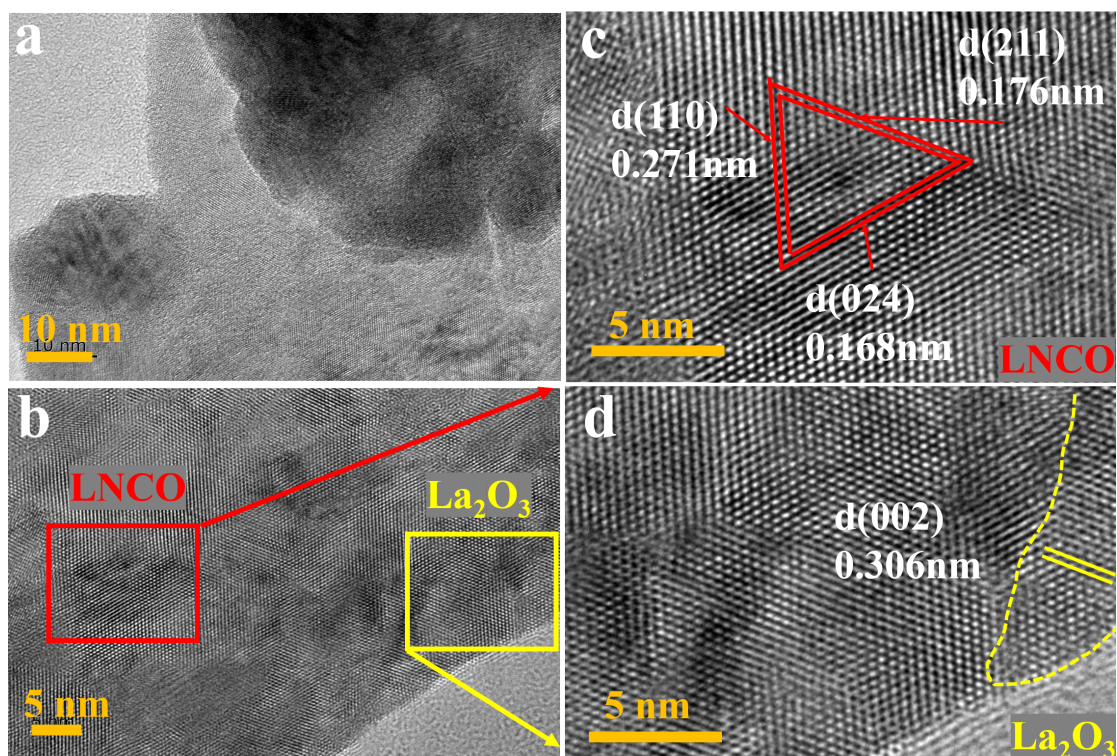

**Fig S3.** TEM and HRTEM of LNCO(1:3)/LO.

**a**

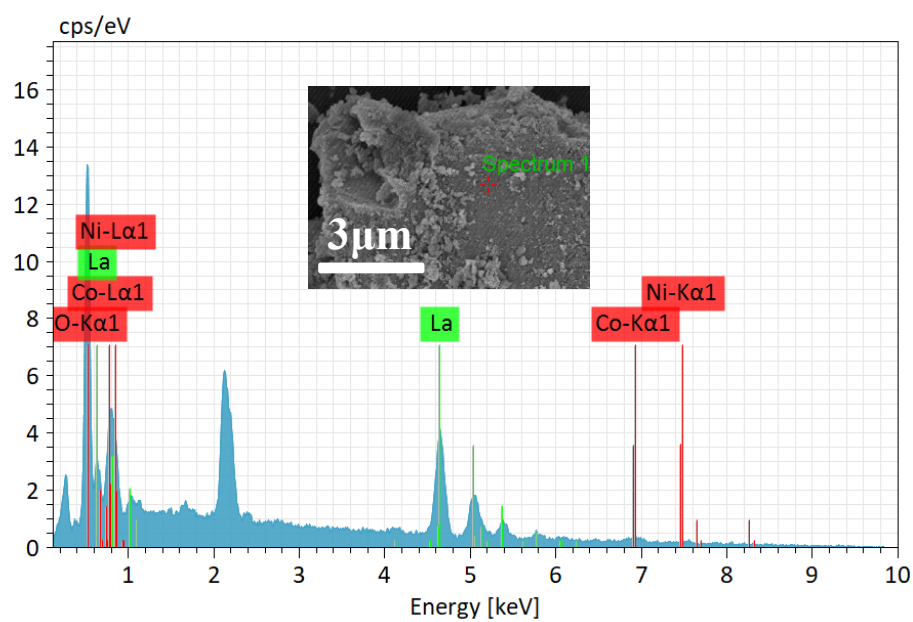

**b**

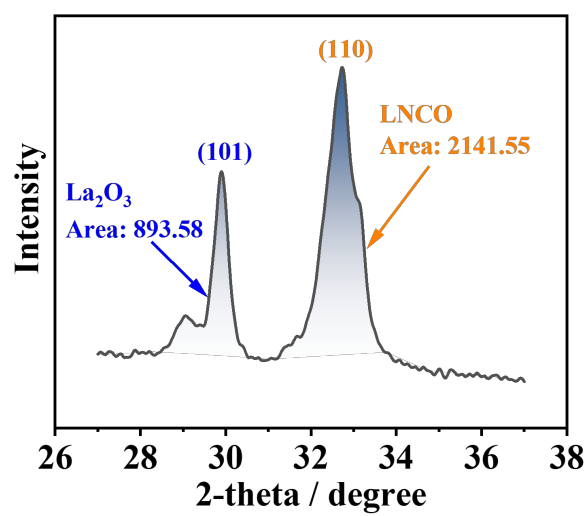

**Fig S4.** (a)EDS (Inset shows scanning spectrum) of LNCO(1:3). (b) XRD peak area fitting.

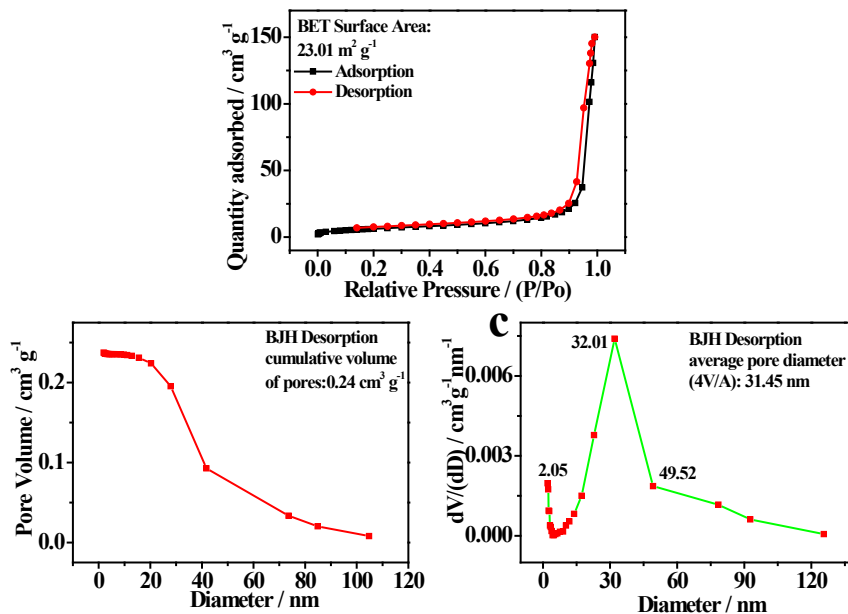

**Fig S5.** Nitrogen sorption isotherms (a), pore volume (b) and pore size distribution (c) of LNCO (1:3)/LO Sample.

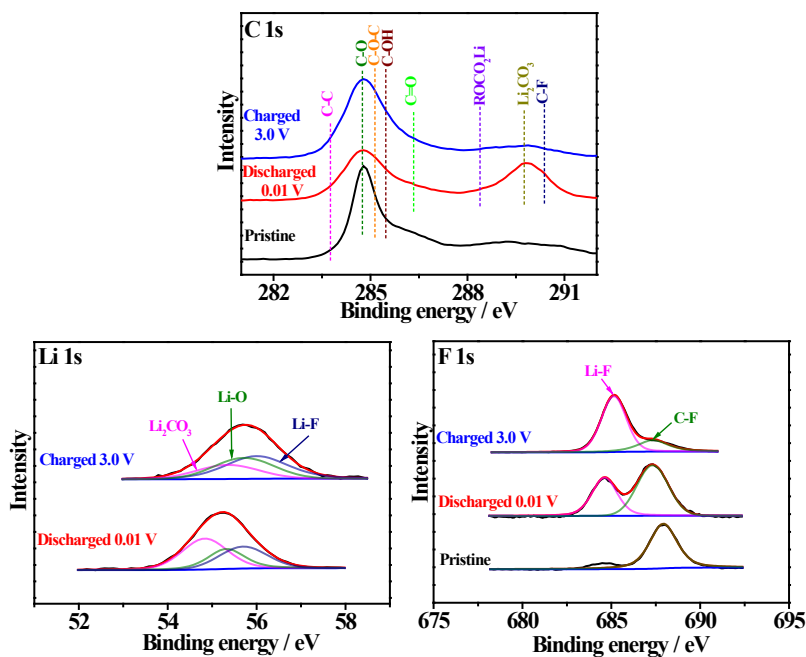

**Fig S6.** Ex-situ XPS spectra of LNCO(1:3)/LO pristine and discharged-0.01 V/charged-3.0 V states during the first discharging/charging cycle at  $0.1 \text{ A g}^{-1}$ : C1s-fitted (a), Li1s- fitted (b) and F1s-fitted (c).

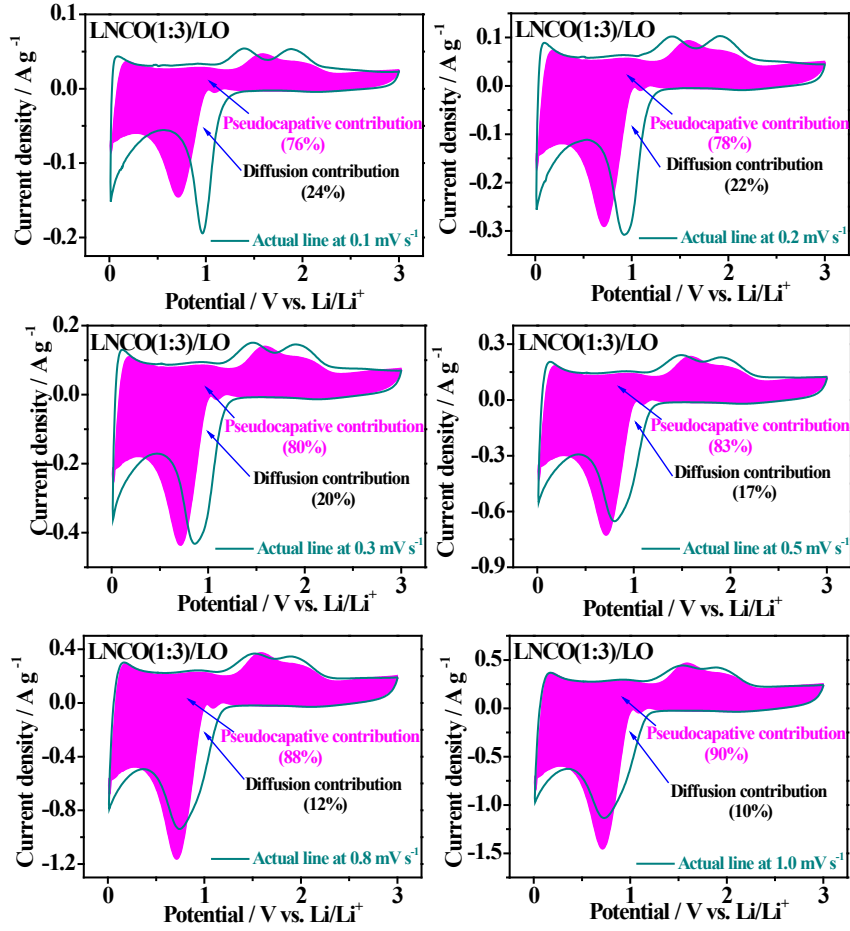

**Fig S7.** The pseudocapacitive and diffusion-controlled contributions to charge storage in the LNCO(1:3)/LO electrode (the shaded region is the identified pseudocapacitive contribution).

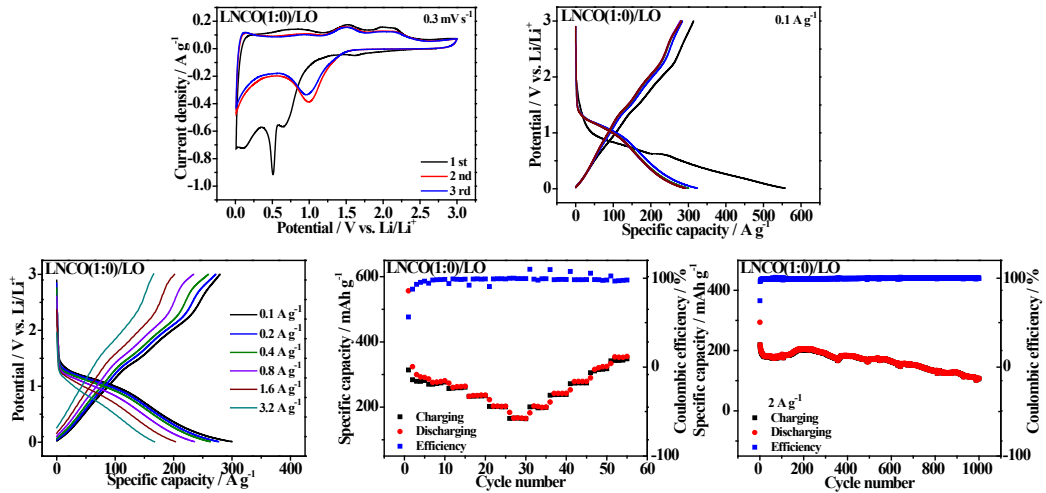

**Fig S8.** Performance of LNCO(1:0)/LO electrode with A electrolytes: CV plots for the first three cycles at  $0.3 \text{ mV s}^{-1}$  (a), GCD curves at  $0.1 \text{ A g}^{-1}$  for the first five cycles (b), GCD curves at  $0.1\text{-}3.2 \text{ A g}^{-1}$  (c), specific capacity and coulombic efficiency at  $0.1\text{-}3.2 \text{ A g}^{-1}$  (d), and cycling behavior at  $2 \text{ A g}^{-1}$  (e).



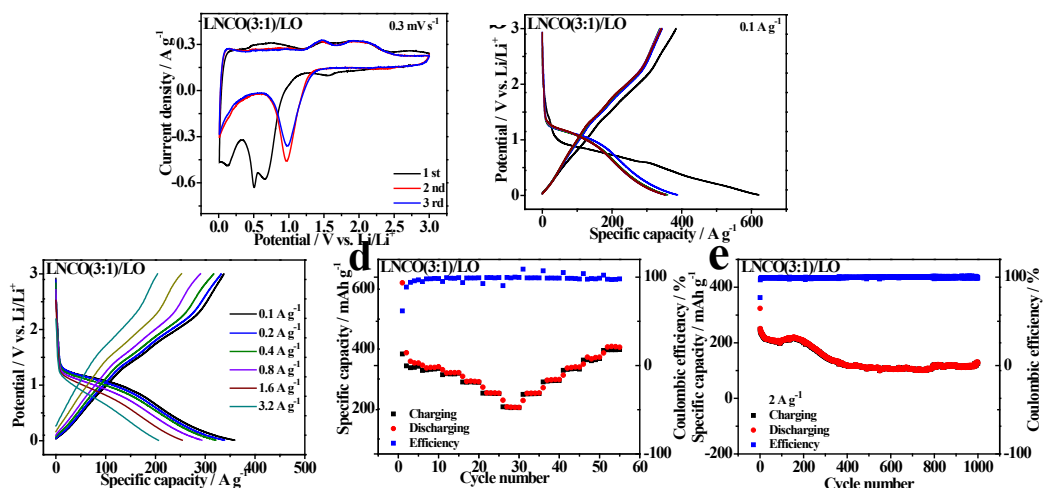

**Fig S9.** Performance of LNCO(3:1)/LO electrode with A electrolytes: CV plots for the first three cycles at 0.3 mV s<sup>-1</sup> (a), GCD curves at 0.1 A g<sup>-1</sup> for the first five cycles (b), GCD curves at 0.1-3.2 A g<sup>-1</sup> (c), specific capacity and coulombic efficiency at 0.1-3.2 A g<sup>-1</sup> (d), and cycling behavior at 2 A g<sup>-1</sup> (e).

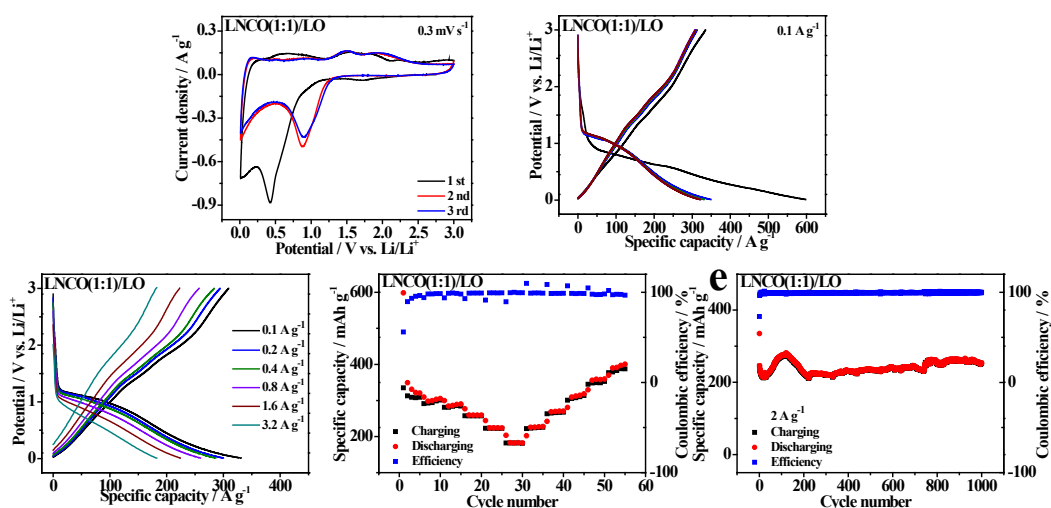

**Fig S10.** Performance of LNCO(1:1)/LO electrode with A electrolytes: CV plots for the first three cycles at 0.3 mV s<sup>-1</sup> (a), GCD curves at 0.1 A g<sup>-1</sup> for the first five cycles (b), GCD curves at 0.1-3.2 A g<sup>-1</sup> (c), specific capacity and coulombic efficiency at 0.1-3.2 A g<sup>-1</sup> (d), and cycling behavior at 2 A g<sup>-1</sup> (e).

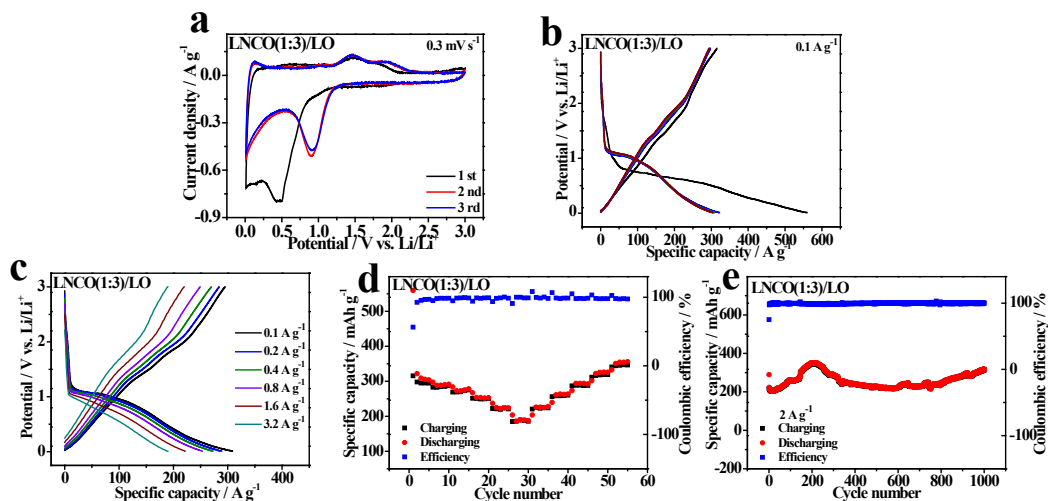

**Fig S11.** Performance of LNCO(1:3)/LO electrode with A electrolytes: CV plots for the first three cycles at 0.3 mV s<sup>-1</sup> (a), GCD curves at 0.1 A g<sup>-1</sup> for the first five cycles (b), GCD curves at 0.1-3.2 A g<sup>-1</sup> (c), specific capacity and coulombic efficiency at 0.1-3.2 A g<sup>-1</sup> (d), and cycling behavior at 2 A g<sup>-1</sup> (e).

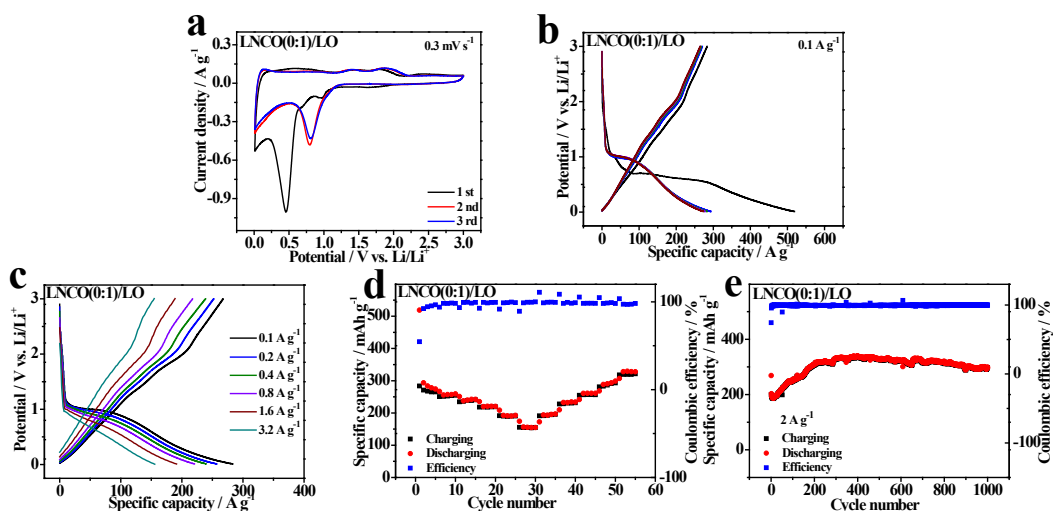

**Fig S12.** Performance of LNCO(0:1)/LO electrode with A electrolytes: CV plots for the first three cycles at 0.3 mV s<sup>-1</sup> (a), GCD curves at 0.1 A g<sup>-1</sup> for the first five cycles (b), GCD curves at 0.1-3.2 A g<sup>-1</sup> (c), specific capacity and coulombic efficiency at 0.1-3.2 A g<sup>-1</sup> (d), and cycling behavior at 2 A g<sup>-1</sup> (e).

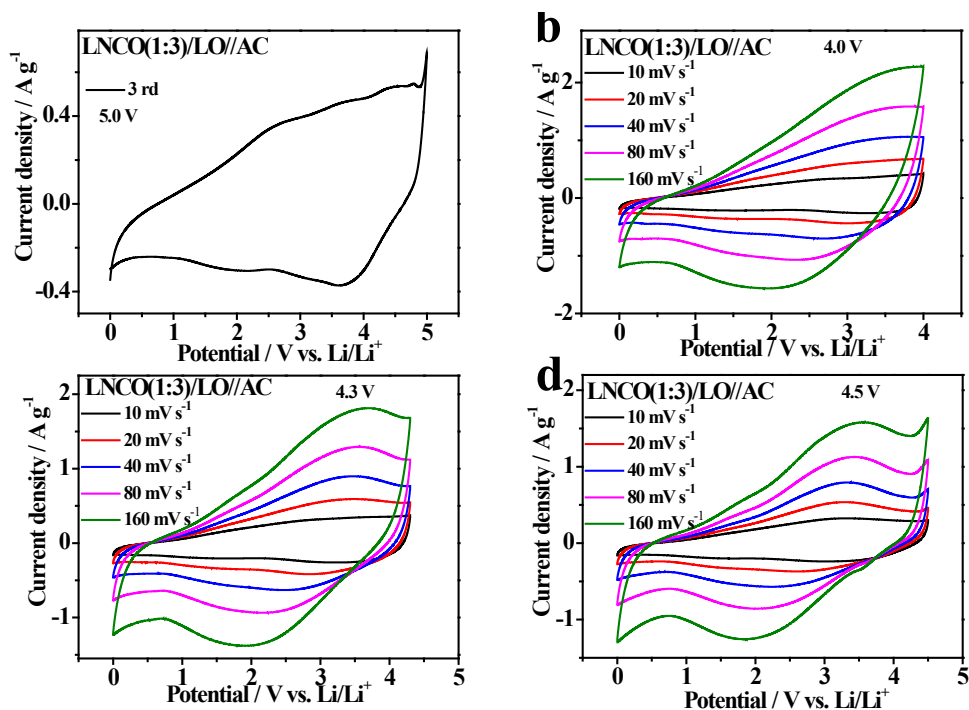

**Fig S13.** Performance of LNCO(1:3)/LO//AC LICs with A electrolytes: CV windows at 10 mV s<sup>-1</sup> (a), CV plots at 10~160 mV s<sup>-1</sup> in 4.0 V (b), 4.3 V (c), 4.5 V (d).

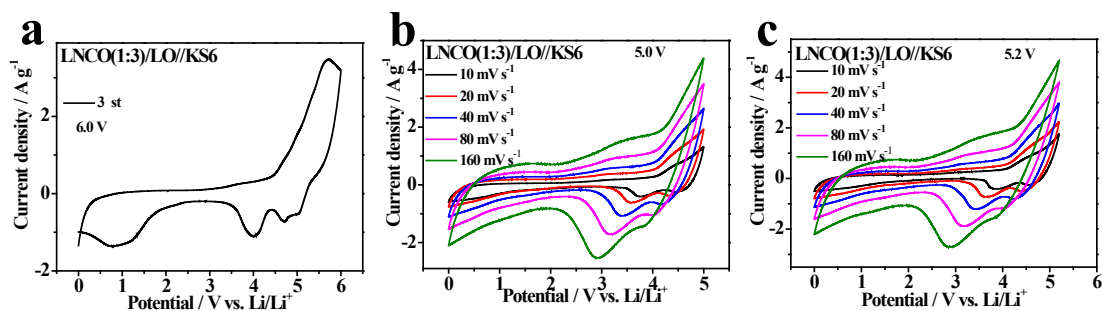

**Fig S14.** Performance of LNCO(1:3)/LO//KS6 DIBs with A electrolytes: CV windows at 10 mV s<sup>-1</sup> (a), CV plots at 10~160 mV s<sup>-1</sup> in 5.0 V (b), 5.2 V (c).

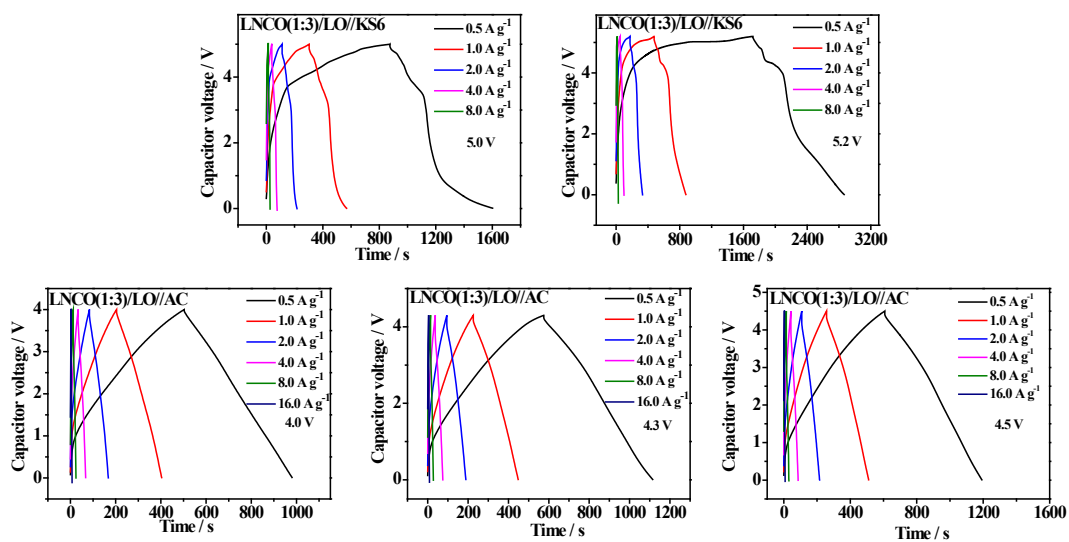

**Fig S15.** GCD curves of LNCO(1:3)/LO//KS6 DIBs and LNCO(1:3)/LO//AC LICs with A electrolytes: GCD curves at 0.5-8.0 A g<sup>-1</sup> in 5.0 V (a), 5.2 V (b) of LNCO(1:3)/LO//KS6 Li-DIBs; GCD curves at 0.5-16.0 A g<sup>-1</sup> in 4.0 V (c), 4.3 V (d), 4.5 V (e) of LNCO(1:3)/LO//AC LICs.

**Table S1.** Chemicals, agents and materials used in the study.

| Chemicals,<br>Agents and Materials                    | Type                     | Company                | Characteristics                                                                                                                                 |
|-------------------------------------------------------|--------------------------|------------------------|-------------------------------------------------------------------------------------------------------------------------------------------------|
| <b>La(NO<sub>3</sub>)<sub>3</sub>•xH<sub>2</sub>O</b> | AR                       | SinoPharm              | La <sub>2</sub> O <sub>3</sub> ≥44%                                                                                                             |
| <b>Ni(NO<sub>3</sub>)<sub>2</sub>•6H<sub>2</sub>O</b> | AR                       | SinoPharm              | purity≥98.0%                                                                                                                                    |
| <b>Co(NO<sub>3</sub>)<sub>2</sub>•6H<sub>2</sub>O</b> | AR                       | SinoPharm              | purity≥98.5%                                                                                                                                    |
| <b>NaOH</b>                                           | AR                       | SinoPharm              | purity≥96.0%                                                                                                                                    |
| <b>Na<sub>2</sub>CO<sub>3</sub></b>                   | AR                       | SinoPharm              | purity≥99.8%                                                                                                                                    |
| <b>AC</b>                                             | YEC 8b                   | FuZhou YiHuan          | D50: ~10 μm; Density: 0.4 g cm <sup>-3</sup> ;<br>SSA:2000~2500 m <sup>2</sup> g <sup>-1</sup><br>D90: 5.8-7.1 μm; Interlayer distance: 0.3354- |
| <b>Graphite</b>                                       | KS6                      | TiMCAL                 | 0.3360 nm;<br>SSA: 20 m <sup>2</sup> g <sup>-1</sup> ;<br>Density-Scott: 0.07 g cm <sup>-3</sup> ;                                              |
| <b>AB</b>                                             | Battery grade            |                        | /                                                                                                                                               |
| <b>NMP</b>                                            | AR                       | Kermel                 | purity≥99.0%                                                                                                                                    |
| <b>PVDF</b>                                           | Battery grade            |                        | /                                                                                                                                               |
| <b>Electrolytes</b>                                   | LBC-305-01               | CAPCHEM                | 1 M LiPF <sub>6</sub> /EC:EMC:DMC (1:1:1) /1% VC                                                                                                |
| <b>Li plate</b>                                       | 15.6*0.45 mm             | China Energy           | 15.6*0.45 mm                                                                                                                                    |
| <b>Cu foil</b>                                        | 200*0.015                | GuangZhou<br>JiaYuan   | Total thickness: 15 μm; weight: 87 g m <sup>-2</sup>                                                                                            |
| <b>Carbon coated-Al foil</b>                          | 222*0.015                | GuagZhou NaNuo         | Total thickness: 17 μm; Strength: 192 Mpa                                                                                                       |
| <b>Glass<br/>microfiber filters</b>                   | GF/D 2.7 μm;<br>1823-025 | Whatman                | Diameter: 25 mm; Thickness: 675 μm;<br>weight: 121 g m <sup>-2</sup>                                                                            |
| <b>Cell components</b>                                | CR-2032                  | ShenZhen<br>TianChenHe | /                                                                                                                                               |

**Table S2.** Specific capacity and cycling retention of the LNCO/LO(Ni:Co=1:0~0:1) electrodes.

| Specific capacity of LNCO/LO(1:0~0:1) electrodes<br>/ (mAh g <sup>-1</sup> ) |       |       |       |       |       |
|------------------------------------------------------------------------------|-------|-------|-------|-------|-------|
| Current density<br>/ (A g <sup>-1</sup> )                                    | 1:0   | 3:1   | 1:1   | 1:3   | 0:1   |
| 0.1                                                                          | 279.2 | 337.5 | 309.1 | 294.9 | 267.6 |
| 0.2                                                                          | 272.0 | 332.3 | 294.2 | 284.3 | 252.2 |
| 0.4                                                                          | 259.4 | 317.1 | 284.0 | 270.0 | 238.9 |
| 0.8                                                                          | 233.9 | 290.2 | 257.1 | 249.3 | 217.8 |
| 1.6                                                                          | 201.4 | 252.3 | 223.0 | 219.5 | 189.3 |
| 3.2                                                                          | 166.2 | 204.4 | 182.1 | 189.3 | 154.7 |
| Cycling behavior                                                             |       |       |       |       |       |
| Retention% / 2 A g <sup>-1</sup> /<br>1000 cycles                            | 48%   | 51%   | 103%  | 146%  | 148%  |

**Table S3.** Specific capacity cycling retention of AC and KS6 electrodes.

| Specific capacity of Positive electrodes / (mAh g <sup>-1</sup> ) |      |      |
|-------------------------------------------------------------------|------|------|
| Current density<br>/ (A g <sup>-1</sup> )                         | AC   | KS6  |
| 0.1                                                               | 86.3 | 91.5 |
| 0.2                                                               | 74.1 | 74.3 |
| 0.4                                                               | 66.0 | 71.0 |
| 0.8                                                               | 58.9 | 66.4 |
| 1.6                                                               | 52.4 | 58.2 |
| 3.2                                                               | 46.2 | 41.8 |
| Cycling behavior                                                  |      |      |
| Retention% / 1 A g <sup>-1</sup> /<br>1000 cycles                 | 77%  | 84%  |

**Table S4.** Performance summary of the LICs and Li-DIBs in the study under room temperature (25 °C),  $m^+/m^-=1:1$ .

| Type           | Capacitor or Cell system | Working voltage / V          | Energy density / Wh kg <sup>-1</sup> | Power density / kW kg <sup>-1</sup> | Cycling behavior / retention%, repeated cycles, current density |
|----------------|--------------------------|------------------------------|--------------------------------------|-------------------------------------|-----------------------------------------------------------------|
| LICs           | LNCO(1:3) /LO//AC        | 0.01-4.0                     | 66.1-55.4                            | 0.5-1.0                             | 85%/1000/5 A g <sup>-1</sup>                                    |
|                |                          |                              | 46.3-37.5                            | 2.0-4.0                             | 83%/2000/5 A g <sup>-1</sup>                                    |
|                |                          |                              | 26.7-15.6                            | 8.0-16.0                            | 74%/3000/5 A g <sup>-1</sup>                                    |
|                |                          |                              |                                      |                                     | 77%/4000/5 A g <sup>-1</sup>                                    |
|                |                          |                              |                                      |                                     | 68%/5000/5 A g <sup>-1</sup>                                    |
|                |                          | 0.01-4.3                     | 80.6-66.5                            | 0.5-1.0                             | 56%/1000/5 A g <sup>-1</sup>                                    |
|                |                          |                              | 56.2-44.6                            | 2.2-4.3                             | 52%/2000/5 A g <sup>-1</sup>                                    |
|                |                          |                              | 33.2-21.0                            | 8.6-17.2                            | 40%/3000/5 A g <sup>-1</sup>                                    |
|                |                          |                              |                                      |                                     | 33%/4000/5 A g <sup>-1</sup>                                    |
|                |                          |                              |                                      |                                     | 30%/5000/5 A g <sup>-1</sup>                                    |
|                |                          | 0.01-4.5                     | 87.1-75.6                            | 0.5-1.0                             | 52%/1000/5 A g <sup>-1</sup>                                    |
|                |                          |                              | 63.9-51.5                            | 2.2-4.3                             | 43%/2000/5 A g <sup>-1</sup>                                    |
|                |                          |                              | 36.3-19.1                            | 8.6-17.2                            | 40%/3000/5 A g <sup>-1</sup>                                    |
|                |                          |                              |                                      |                                     | 38%/4000/5 A g <sup>-1</sup>                                    |
|                |                          |                              |                                      |                                     | 37%/5000/5 A g <sup>-1</sup>                                    |
|                | Li-DIBs                  | LNCO(1:3) /LO//KS6           | 0.01-5.0                             | 116.2-99.4                          | 0.6-1.4                                                         |
| 72.9-52.8-36.1 |                          |                              |                                      | 2.5-5.0-10.0                        | 88%/200/2 A g <sup>-1</sup>                                     |
|                |                          |                              |                                      |                                     | 81%/300/2 A g <sup>-1</sup>                                     |
|                |                          |                              |                                      |                                     | 70%/400/2 A g <sup>-1</sup>                                     |
|                |                          |                              |                                      |                                     | 60%/500/2 A g <sup>-1</sup>                                     |
| 0.01-5.2       |                          |                              |                                      |                                     | 37%/1000/2 A g <sup>-1</sup>                                    |
|                |                          |                              |                                      |                                     | 60%/100/2 A g <sup>-1</sup>                                     |
|                |                          |                              |                                      |                                     | 49%/200/2 A g <sup>-1</sup>                                     |
|                |                          |                              | 206.0-166.3                          | 0.6-1.5                             | 39%/300/2 A g <sup>-1</sup>                                     |
|                |                          |                              | 114.0-69.3-40.4                      | 2.6-5.2-10.4                        | 29%/400/2 A g <sup>-1</sup>                                     |
|                |                          |                              | 22%/500/2 A g <sup>-1</sup>          |                                     |                                                                 |
|                |                          | 12%/1000/2 A g <sup>-1</sup> |                                      |                                     |                                                                 |

**Table S5.** A comparison for the performance of the LNCO(1:3)/LO//AC LICs in the study with some reported LICs.

| LICs                                                 | Working voltage/ V | Energy density / Wh kg <sup>-1</sup> | Power density / kW kg <sup>-1</sup> | Cycling behavior / retention%, repeated cycles, current density | Refs.            |
|------------------------------------------------------|--------------------|--------------------------------------|-------------------------------------|-----------------------------------------------------------------|------------------|
| Li <sub>3</sub> VO <sub>4</sub> /N-C//AC             | 1.0-4.0            | 136.4-24.4                           | 0.53-11                             | 87%/1500/2 A g <sup>-1</sup>                                    | 1                |
| TiNb <sub>2</sub> O <sub>7</sub> @C//CFs             | 0.8-3.2            | 110.4-20                             | 0.1-5.46                            | 77%/1500/0.2 A g <sup>-1</sup>                                  | 2                |
| MnO@C//PC                                            | 0.1-4.0            | 117.6-27.8                           | 0.4-10.2                            | 76%/5000/1 A g <sup>-1</sup>                                    | 3                |
| AC/TiO <sub>2</sub> @PCNF-12                         | 0.0-3.0            | 67.4-27.5                            | 0.075-5                             | 85%/10000/10 A g <sup>-1</sup>                                  | 4                |
| AC-HBP//LiC <sub>6</sub>                             | 2.0-3.9            | 100-20                               | 0.3-2                               | 70%/2000/0.5 A g <sup>-1</sup>                                  | 5                |
| TiO <sub>2</sub> /graphene//AC                       | 1.0-3.0            | 42-8.9                               | 0.8-8                               | 100%/6500/4 A g <sup>-1</sup>                                   | 6                |
| H-TiO <sub>2</sub> /PPy/SWCNTs//AC                   | 1.0-3.0            | 31.3-1.9                             | 0.2-4.0                             | 77.8%/3000/0.5 A g <sup>-1</sup>                                | 7                |
| SnO <sub>2</sub> -C//C                               | 0.5-4.0            | 110-45                               | 0.19-2.96                           | 80%/2000/1 A g <sup>-1</sup>                                    | 8                |
| Graphene-VN//carbon nanorods                         | 0.0-4.0            | 162-64                               | 0.2-10                              | 83%/1000/2 A g <sup>-1</sup>                                    | 9                |
| T-Nb <sub>2</sub> O <sub>5</sub> /Graphene paper//AC | 0.5-3.0            | 47-15                                | 0.39-18                             | 93%/2000/0.25 A g <sup>-1</sup>                                 | 10               |
| Fe <sub>3</sub> O <sub>4</sub> /Graphene//Graphene   | 1.0-4.0            | 147-86                               | 0.15-2.5                            | 70%/1000/2 A g <sup>-1</sup>                                    | 11               |
| <b>LNCO(1:3)/LO//AC</b>                              | <b>0.01-4.0</b>    | <b>66.1-55.4</b>                     | <b>0.5-1.0</b>                      | <b>85%/1000/5 A g<sup>-1</sup></b>                              | <b>This work</b> |
|                                                      |                    | <b>46.3-37.5</b>                     | <b>2.0-4.0</b>                      | <b>83%/2000/5 A g<sup>-1</sup></b>                              |                  |
|                                                      |                    | <b>26.7-15.6</b>                     | <b>8.0-16.0</b>                     | <b>74%/3000/5 A g<sup>-1</sup></b>                              |                  |
|                                                      |                    |                                      |                                     | <b>77%/4000/5 A g<sup>-1</sup></b>                              |                  |
|                                                      |                    |                                      |                                     | <b>68%/5000/5 A g<sup>-1</sup></b>                              |                  |



**Table S6.** A comparison for the performance of the LNCO(1:3)/LO//KS6 Li-DIBs in the study with some reported Li-DIBs.

| Li-DIBs                                   | Working voltage/ V | Energy density / Wh kg <sup>-1</sup> | Power density / kW kg <sup>-1</sup> | Cycling behavior / retention%, repeated cycles, current density | Refs.     |
|-------------------------------------------|--------------------|--------------------------------------|-------------------------------------|-----------------------------------------------------------------|-----------|
| Graphite//Graphite                        | 0.01-5.2           | 108                                  |                                     | 67%/50/0.05 A g <sup>-1</sup>                                   | 12        |
| Si-compound//Graphite                     | 0-3                | 54                                   |                                     | 53%/100/0.1 A g <sup>-1</sup>                                   | 13        |
| Nb <sub>2</sub> O <sub>5</sub> //Graphite | 1.5-3.5            | 52                                   |                                     | 84%/100/0.1 A g <sup>-1</sup>                                   | 14        |
| TiO <sub>2</sub> //Graphite               | 1.5-3.7            | 36                                   |                                     | 88%/50/0.1 A g <sup>-1</sup>                                    | 15        |
| MoO <sub>3</sub> //Graphite               | 1.5-3.5            | 77                                   |                                     | 90%/200/0.081 A g <sup>-1</sup>                                 | 16        |
| AC//Graphite                              | 0-3.5              | 150                                  |                                     | 98% /100 /1.86 mA cm <sup>-2</sup>                              | 17        |
| Graphite//Graphite                        | 3-5                | 170                                  |                                     | 94%/500/0.5 A g <sup>-1</sup>                                   | 18        |
| Al//Graphite                              | 3.0-5.0            | 150                                  | 1.2                                 | 98%/600/0.2 A g <sup>-1</sup>                                   | 19        |
| MTI//KS6-DIB                              | 3.0-5.1            | 125                                  | 0.4                                 | 90%/200/0.5 A g <sup>-1</sup>                                   | 20        |
| LNCO(1:3)/LO//KS6                         | 0.01-5.0           | 116.2-99.4<br>72.9-52.8-36.1         | 0.6-1.4<br>2.5-5.0-10.0             | 93%/100/2 A g <sup>-1</sup>                                     | This work |
|                                           |                    |                                      |                                     | 88%/200/2 A g <sup>-1</sup>                                     |           |
|                                           |                    |                                      |                                     | 81%/300/2 A g <sup>-1</sup>                                     |           |
|                                           |                    |                                      |                                     | 70%/400/2 A g <sup>-1</sup>                                     |           |
|                                           |                    |                                      |                                     | 60%/500/2 A g <sup>-1</sup>                                     |           |
|                                           |                    |                                      |                                     | 37%/1000/2 A g <sup>-1</sup>                                    |           |

## References

1. L. F. Shen, H. F. Lv, S. Q. Chen, P. Kopold, P. A. van Aken, X. J. Wu, J. Maier and Y. Yu, *Adv. Mater.*, 2017, **29**, 1700142.
2. X. F. Wang and G. Z. Shen, *Nano Energy*, 2015, **15**, 104-115.
3. D. Yan, S.-H. Li, L.-P. Guo, X.-L. Dong, Z.-Y. Chen and W.-C. Li, *ACS Appl. Mater. Interfaces*, 2018, **10**, 43946-43952.
4. C. Yang, J.-L. Lan, W.-X. Liu, Y. Liu, Y.-H. Yu and X.-P. Yang, *ACS Appl. Mater. Interfaces*, 2017, **9**, 18710-18719.
5. A. Jain, S. Jayaraman, M. Ulaganathan, R. Balasubramanian, V. Aravindan, M. P. Srinivasan and S. Madhavi, *Electrochim. Acta*, 2017, **228**, 131-138.
6. H. Kim, M. Y. Cho, M. H. Kim, K. Y. Park, H. Gwon, Y. Lee, K. C. Roh and K. Kang, *Adv. Energy Mater.*, 2013, **3**, 1500-1506.
7. G. Tang, L. J. Cao, P. Xiao, Y. H. Zhang and H. Liu, *J. Power Sources*, 2017, **355**, 1-7.
8. W.-H. Qu, F. Han, A.-H. Lu, C. Xing, M. Qiao and W.-C. Li, *J. Mater. Chem. A*, 2014, **2**, 6549-6557.
9. R. T. Wang, J. W. Lang, P. Zhang, Z. Y. Lin and X. B. Yan, *Adv. Funct. Mater.*, 2015, **25**, 2270-2278.
10. L. P. Kong, C. F. Zhang, J. T. Wang, W. M. Qiao, L. C. Ling and D. H. Long, *ACS Nano*, 2015, **9**, 11200-11208.
11. F. Zhang, T. F. Zhang, X. Yang, L. Zhang, K. Leng, Y. Huang and Y. S. Chen, *Energy Environ. Sci.*, 2013, **6**, 1623-1632.
12. J. A. Read, A. V. Cresce, M. H. Ervin and K. Xu, *Energy Environ. Sci.*, 2014, **7**, 617-620.
13. H. Nakano, Y. Sugiyama, T. Morishita, M. J. S. Spencer, I. K. Snook, Y. Kumai and H. Okamoto, *J. Mater. Chem. A*, 2014, **2**, 7588-7592.
14. G. Park, N. Gunawardhana, C. Lee, S.-M. Lee, Y.-S. Lee and M. Yoshio, *J. Power Sources*, 2013, **236**, 145-150.
15. A. K. Thapa, G. Park, H. Nakamura, T. Ishihara, N. Moriyama, T. Kawamura, H. Wang and M. Yoshio, *Electrochim. Acta*, 2010, **55**, 7305-7309.
16. N. Gunawardhana, G.-J. Park, N. Dimov, A. K. Thapa, H. Nakamura, H. Wang, T. Ishihara and M. Yoshio, *J. Power Sources*, 2011, **196**, 7886-7890.
17. T. Ishihara, Y. Yokoyama, F. Kozono and H. Hayashi, *J. Power Sources*, 2011, **196**, 6956-6959.
18. S. Rothermel, P. Meister, G. Schmuelling, O. Fromm, H.-W. Meyer, S. Nowak, M. Winter and T. Placke, *Energy Environ. Sci.*, 2014, **7**, 3412-3423.

19. X. L. Zhang, Y. B. Tang, F. Zhang and C. S. Lee, *Adv. Energy Mater.*, 2016, **6**, 1502588.
20. C. Y. Chan, P.-K. Lee, Z. Xu and D. Y. W. Yu, *Electrochim. Acta*, 2018, **263**, 34-39.
